# Supplementary material for: Structure-guided glyco-engineering of ACE2 for improved potency as soluble SARS-CoV-2 decoy receptor
Source: eLife. 2021 Dec 20;10:e73641. doi: 10.7554/eLife.73641 (PMC8730730; doi:10.7554/eLife.73641)
Supplement: Supplementary file 1. — Blue squares indicate N-acetylglucosamine, green circles mannose, yellow circles galactose, purple squares sialic acid and green triangles fucose residues. Anomericity and positions of glycosidic linkages are indicated where necessary. [file elife-73641-supp1.xlsx]

## Sheet: Sheet1
Protein	Glycosylation site	Glycan structure
SARS-CoV-2 Spike	N61
	N74 N122 N149 N165
	N234
	N282 N331 N343
	N603
	N616 N657
	N709 N717 N801
	N1098 N1134
human ACE2	N53 N90 N103 N322 N432 N546 N690
